# Supplementary material for: Identification of Acinetobacter baumannii loci for capsular polysaccharide (KL) and lipooligosaccharide outer core (OCL) synthesis in genome assemblies using curated reference databases compatible with Kaptive
Source: PubMed Central journal article supplement (PMC7200062; doi:10.1099/mgen.0.000339), 2020-03-02
Supplement: mgen-6-339-s001.pdf [file mgen-6-339-s001.pdf]

**Table S1.** GenBank and WGS accession numbers for the sequences used to construct the *A. baumannii* KL database

| <b>K locus</b>    | <b>Reference isolate</b> | <b>GenBank or WGS accession number</b> | <b>Base range</b> | <b>Reference</b> |
|-------------------|--------------------------|----------------------------------------|-------------------|------------------|
| KL1               | A1                       | CP010781.1                             | 87963..110544     | (1, 2)           |
| KL2               | A74                      | KJ459911.1                             | 3057..27820       | (1, 3, 4)        |
| KL3               | D86                      | KF793926.1                             | 3248..25749       | (1)              |
| KL4               | D78                      | JN409449.3                             | 3247..31285       | (1, 2, 5)        |
| KL5               | SDF                      | BK010760 <sup>2</sup>                  | 1..25029          | (1, 6, 7, 8, 9)  |
| KL6               | F4                       | KF130871.1                             | 3248..26268       | (1, 4, 10)       |
| KL7               | SGH0701                  | KX011025.2                             | 3058..28708       | (1, 6, 8)        |
| KL8               | BAL097                   | KX712116.2                             | 724..32274        | (1, 6, 11)       |
| KL9               | RUH134                   | JN247441.4                             | 3250..28148       | (1)              |
| KL10              | BAL_030                  | KY434633.1                             | 3058..28938       | (1, 12)          |
| KL11              | J9                       | KF002790.2                             | 745..26607        | (13)             |
| KL12              | D36                      | JN107991.2                             | 3247..38792       | (2, 6, 14)       |
| KL13              | Ab689                    | MF522810.1                             | 724..36552        | (6, 15)          |
| KL14              | D46                      | KF030679.2                             | 724..21932        | (16, 36)         |
| KL15              | A85                      | KC118540.6                             | 9179..37114       | (2, 17, 18)      |
| KL16              | D4                       | MF522813.1                             | 724..23467        | (19)             |
| KL17              | G7                       | KC118541.2                             | 3247..25474       | (2)              |
| KL18              | Ab762                    | MF522811.2                             | 724..24288        | (20)             |
| KL19              | RBH2                     | KU165787.1                             | 724..22129        | (21, 22)         |
| KL20              | A388                     | JQ684178.2                             | 3250..32301       | (2, 23)          |
| KL21              | G21                      | MG231275.1                             | 3058..33061       | (23)             |
| KL22              | LUH5537                  | KC526920.2 <sup>3</sup>                | 3248..27716       | (24)             |
| KL23              | Ab836                    | MF522812.1                             | 724..25107        | (4)              |
| KL24              | RCH51                    | KX756650.1                             | 724..25150        | (12)             |
| KL25              | AB5075                   | BK008886 <sup>2</sup>                  | 1..23498          | (2, 25)          |
| KL26              | Ab902                    | MF522809.1                             | 724..28488        | (13)             |
| KL27 <sup>1</sup> | 4190                     | KT266827.1                             | 382..31000        | (6, 26)          |
| KL28              | Ab908                    | MF522807.1                             | 724..26378        | (6)              |
| KL29              | 2007-16-27-01            | AMIR01000046.1 <sup>4</sup>            | 11241..36611      | (13)             |
| KL30              | NIPH 190                 | MN166189.1                             | 1..20785          | (27)             |
| KL31              | OIFC0162                 | AMFH01000019.1 <sup>4</sup>            | 107741..131132    | (4)              |
| KL32              | BAL 058                  | KT359615.1                             | 724..22514        | (3)              |
| KL33              | NIPH 67                  | MN166195.1                             | 1..22775          | (4, 28)          |
| KL34              | BJAB07104                | CP003846.1 <sup>4</sup>                | 94048..118441     | (23)             |
| KL35              | LUH5535                  | KC526896.2 <sup>3</sup>                | 4373..27270       | (18)             |
| KL36              | Naval-72                 | AMFI01000021.1 <sup>4</sup>            | 38074..64065      | (13)             |
| KL37              | UV1036                   | KX712115.1                             | 724..21811        | (24, 36)         |
| KL38              | 4300STDY7045887          | UFOG01000008.1 <sup>4</sup>            | 32622..55633      | -                |
| KL39              | AB_2008-15-71            | AMHP01000019.1 <sup>4</sup>            | 57921..78767      | (21)             |
| KL40              | D141c                    | KP100029.1                             | 724..24731        | (2)              |
| KL41              | Naval-57                 | AMFP01000100 <sup>4</sup>              | 42104..65411      | -                |
| KL42              | NIPH24                   | MN166194.1                             | 1..22901          | (4, 29)          |
| KL43              | NIPH 60                  | MN166192.1                             | 1..19982          | (30)             |
| KL44 <sup>1</sup> | NIPH 70                  | MN148385.1                             | 1..26811          | (6, 26)          |
| KL45              | NIPH 201                 | MN166190.1                             | 1..21078          | (27)             |
| KL46              | NIPH 329                 | MK609549.1                             | 1..23617          | (4, 9)           |
| KL47              | UV1043                   | KX661320.1                             | 724..22352        | (30)             |
| KL48              | NIPH 615                 | MN166191.1                             | 1..20705          | (27)             |
| KL49              | BAL_173                  | KT359616.1                             | 724..32883        | (3, 6)           |
| KL50              | OIFC047                  | AMFW01000039.1 <sup>4</sup>            | 35120..58660      | -                |
| KL51              | WM98c                    | MN148384.1                             | 1..22098          | -                |
| KL52              | H32                      | KY434632.1                             | 3057..23978       | -                |
| KL53              | D23                      | MH190222.1                             | 736..21707        | (22)             |
| KL54              | RCH52                    | MG867726.1                             | 724..32088        | (11)             |

|                    |            |                             |              |          |
|--------------------|------------|-----------------------------|--------------|----------|
| KL55               | BAL_204    | MN148381.1                  | 1..24890     | -        |
| KL57               | BAL_212    | KY434631.1                  | 724..26129   | (31)     |
| KL58               | BAL_114    | KT359617.1                  | 724..25347   | (3)      |
| KL60               | BAL_329    | MN148382.1                  | 1..24516     | (12)     |
| KL63               | BAL_103    | KX712117.2                  | 724..32678   | (6)      |
| KL73               | SGH0703    | MF362178.1                  | 724..36545   | (15, 32) |
| KL74               | BAL_309    | MN148383.1                  | 1..25336     | -        |
| KL77               | MSHR_188   | MK370019.1                  | 1..23882     | (20)     |
| KL80               | LUH3712    | KC526914.2 <sup>3</sup>     | 3090..27616  | (12)     |
| KL81               | LUH3713    | KC526916.2 <sup>3</sup>     | 3247..29414  | (10)     |
| KL82 <sup>1</sup>  | LUH5534    | KC526908.2 <sup>3</sup>     | 3248..23847  | (33)     |
| KL83               | LUH5538    | KC526898.2 <sup>3</sup>     | 538..26632   | (13)     |
| KL84               | LUH5540    | KC526902.2 <sup>3</sup>     | 3252..26477  | -        |
| KL85               | LUH5543    | KC526913.2 <sup>3</sup>     | 3089..27646  | -        |
| KL87 <sup>1</sup>  | LUH5547    | KC526918.2 <sup>3</sup>     | 3249..32444  | (13)     |
| KL88               | LUH5548    | KC526910.2 <sup>3</sup>     | 3193..23919  | (30)     |
| KL89               | LUH5552    | KC526919.2 <sup>3</sup>     | 3159..27654  | (12)     |
| KL90               | LUH5553    | KC526917.2 <sup>3</sup>     | 3191..26854  | (8)      |
| KL91               | 1053       | KM402814.1                  | 1832..24537  | (34)     |
| KL93 <sup>1</sup>  | B11911     | BK010902 <sup>2</sup>       | 1..27476     | (35)     |
| KL102              | MSHR_200   | MK370021.1                  | 1..21075     | (20)     |
| KL105              | 625974     | JEXD01000015.1 <sup>4</sup> | 32795..58839 | (13)     |
| KL106              | 219_ABAU   | JVPN01000008.1 <sup>4</sup> | 31656..58916 | (13)     |
| KL107              | MSHR_183   | MK370022.1                  | 1..22790     | (20)     |
| KL108              | MSHR_204   | MK370023.1                  | 1..31284     | (20)     |
| KL109              | MSHR_192   | MK370024.1                  | 1..24118     | (20)     |
| KL110              | MSHR_203   | MK370025.1                  | 1..34861     | (20)     |
| KL111              | MSHR_53    | MK370026.1                  | 1..23163     | (20)     |
| KL112              | MSHR_54    | MK370027.1                  | 1..25441     | (20)     |
| KL113              | MSHR_8     | MK370028.1                  | 1..29261     | (20)     |
| KL114 <sup>1</sup> | MSHR_89    | MK388214.1                  | 1..27862     | (20)     |
| KL116              | MAR-303    | MK339425.1                  | 3275..23797  | (36, 37) |
| KL118 <sup>1</sup> | TG00314    | ASER01000021.1 <sup>4</sup> | 37142..66310 | (23)     |
| KL119              | ARLG1794   | NGGP01000084.1 <sup>4</sup> | 30036..54769 | (31)     |
| KL120              | ABBL011    | LLCR01000062.1 <sup>4</sup> | 15005..38992 | (9)      |
| KL124              | ABUH511    | NCXX01000026.1 <sup>4</sup> | 32588..54524 | (33)     |
| KL125              | MAR13-1452 | MH306195.1                  | 5072..32981  | (38)     |
| KL128              | KZ-1093    | MK339428.1                  | 3274..5469   | (37)     |

<sup>1</sup> Sequence has been modified to remove IS or IS remnants for inclusion in the KL database

<sup>2</sup> Third Party Accession (TPA) including current nomenclature and naming

<sup>3</sup> Old annotations updated in this study consistent with established nomenclature scheme (1).

<sup>4</sup> GenBank or WGS sequence not including current nomenclature and naming

## References

1. Kenyon J, Hall R. Variation in the complex carbohydrate biosynthesis loci of *Acinetobacter baumannii* genomes. PLoS One. 2013;8(4):e62160.
2. Holt K, Kenyon J, Hamidian M, Schultz M, Pickard D, Dougan G, et al. Five decades of genome evolution in the globally distributed, extensively antibiotic resistant *Acinetobacter baumannii* global clone 1. Microbial Genomics. 2016;2(2):e000052.
3. Schultz M, Thanh D, Hoan N, Wick R, Ingle D, Hawkey J, et al. Repeated local emergence of carbapenem-resistant *Acinetobacter baumannii* in a single hospital ward. Microbial Genomics. 2016;2(3):e000050.

4. Kenyon J, Marzaioli A, Hall R, De Castro C. Structure of the K2 capsule associated with the KL2 gene cluster of *Acinetobacter baumannii*. *Glycobiology*. 2014;24(6):554-63.
5. Kenyon J, Speciale I, Hall R, De Castro C. Structure of repeating unit of the capsular polysaccharide from *Acinetobacter baumannii* D78 and assignment of the K4 gene cluster. *Carbohydrate Research*. 2016;434:12-7.
6. Kenyon J, Marzaioli A, De Castro C, Hall R. 5,7-Di-*N*-acetylacinetaminic acid - a novel non-2-ulosonic acid found in the capsule of an *Acinetobacter baumannii* isolate. *Glycobiology*. 2015;25(6):644-54.
7. Arbatsky N, Kenyon J, Shashkov A, Shneider M, Popova A, Kalinchuk N, et al. The K5 capsular polysaccharide of the bacterium *Acinetobacter baumannii* SDF with the same K unit containing Leg5Ac7Ac as the K7 capsular polysaccharide but a different linkage between the K units. *Russ Chem Bull*. 2019;Int. Ed. 68(1):163-7.
8. Senchenkova SN, Kenyon JJ, Jia T, Popova AV, Shneider MM, Kasimova AA, et al. The K90 capsular polysaccharide produced by *Acinetobacter baumannii* LUH5553 contains di-*N*-acetylpsseudaminic acid and is structurally related to the K7 polysaccharide from *A. baumannii* LUH5533. *Carbohydr Res*. 2019;479:1-5.
9. Kenyon JJ, Arbatsky NP, Shneider MM, Popova AV, Dmitrenok AS, Kasimova AA, et al. The K46 and K5 capsular polysaccharides produced by *Acinetobacter baumannii* NIPH 329 and SDF have related structures and the side-chain non-ulosonic acids are 4-*O*-acetylated by phage-encoded *O*-acetyltransferases. *PLoS One*. 2019;14(6):e0218461.
10. Kenyon J, Marzaioli A, Hall R, De Castro C. Structure of the K6 capsular polysaccharide from *Acinetobacter baumannii* isolate RBH4. *Carbohydrate Research*. 2015;409:30-5.
11. Arbatsky N, Kenyon J, Kasimova A, Shashkov A, Shneider M, Popova A, et al. K units of the K8 and K54 capsular polysaccharides produced by *Acinetobacter baumannii* BAL 097 and RCH52 have the same structure but contain different di-*N*-acyl derivatives of legionaminic acid and are linked differently. *Carbohydr Res*. 2019;CAR\_2019\_238.
12. Kenyon J, Kasimova A, Shneider M, Shashkov A, Arbatsky N, Popova A, et al. The KL24 gene cluster and a genomic island encoding a Wzy polymerase contribute genes needed for synthesis of the K24 capsular polysaccharide by the multiply antibiotic resistant *Acinetobacter baumannii* isolate RCH51. *Microbiology*. 2017;163:355-63.
13. Kenyon J, Shashkov A, Senchenkova S, Shneider M, Liu B, Popova A, et al. *Acinetobacter baumannii* K11 and K83 capsular polysaccharides have the same 6-deoxy-*l*-talose-containing pentasaccharide K units but different linkages between the K units. *International Journal of Biological Macromolecules*. 2017;103:648-55.
14. Kenyon J, Marzaioli A, Hall R, De Castro C. Structure of the K12 capsule containing 5,7-di-*N*-acetylacinetaminic acid from *Acinetobacter baumannii* isolate D36. *Glycobiology*. 2015;25(8):881-7.
15. Kenyon J, Kasimova A, Notaro A, Arbatsky N, Speciale I, Shashkov A, et al. *Acinetobacter baumannii* K13 and K73 capsular polysaccharides differ only in K-unit side branches of novel non-2-ulosonic acids: di-*N*-acetylated forms of either acinetaminic acid or 8-epiacinetaminic acid. *Carbohydrate Research*. 2017;452:149-55.
16. Kenyon J, Hall R, De Castro C. Structural determination of the K14 capsular polysaccharide from an ST25 *Acinetobacter baumannii* isolate, D46. *Carbohydrate Research*. 2015;417:52-6.
17. Hamidian M, Kenyon J, Holt K, Pickard D, Hall R. A conjugative plasmid carrying the carbapenem resistance gene *bla*OXA-23 in AbaR4 in an extensively resistant GC1

- Acinetobacter baumannii* isolate. Journal of Antimicrobial Chemotherapy. 2014;69(10):2625-8.
18. Shashkov A, Liu B, Kenyon J, Popova A, MM S, Senchenkova S, et al. Structures of the K35 and K15 capsular polysaccharides of *Acinetobacter baumannii* LUH5535 and LUH5554 containing amino and diamino uronic acids. Carbohydrate Research. 2017;448:28-34.
  19. Kenyon JJ, Arbatsky NP, Sweeney EL, Shashkov AS, Shneider MM, Popova AV, et al. Production of the K16 capsular polysaccharide by *Acinetobacter baumannii* ST25 isolate D4 involves a novel glycosyltransferase encoded in the KL16 gene cluster. International Journal of Biological Macromolecules. 2019;128:101-6.
  20. Meumann E, Anstey N, Currie B, Piera K, Kenyon J, Hall R, et al. Genomic epidemiology of severe community-onset *Acinetobacter baumannii* infection. Microbial Genomics. 2019;5.
  21. Kenyon J, Shneider M, Senchenkova S, Shashkov A, Siniagina M, Malanin S, et al. The K19 capsular polysaccharide of *Acinetobacter baumannii* is produced via a Wzy polymerase encoded in a small genomic island rather than the KL19 capsule gene cluster. Microbiology. 2016;162:1479-89.
  22. Shashkov A, Kenyon J, Arbatsky N, Shneider M, Popova A, Knirel Y, et al. Genetics of biosynthesis and structure of the K53 capsular polysaccharide of *Acinetobacter baumannii* D23 made up of a disaccharide K unit. Microbiology. 2018;164:1289-92.
  23. Kasimova A, Kenyon J, Arbatsky N, Shashkov A, Popova A, Shneider M, et al. *Acinetobacter baumannii* K20 and K21 capsular polysaccharide structures establish roles for UDP-glucose dehydrogenase Ugd2, pyruvyl transferase Ptr2 and two glycosyltransferases. Glycobiology. 2018;28(11):876-84.
  24. Arbatsky N, Shneider M, Kenyon J, Shashkov A, Popova A, Miroshnikov K, et al. Structure of the neutral capsular polysaccharide of *Acinetobacter baumannii* NIPH146 that carries the KL37 capsule gene cluster. Carbohydrate Research. 2015;413:12-5.
  25. Senchenkova S, Shashkov A, Popova A, Shneider M, Arbatsky N, Miroshnikov K, et al. Structure elucidation of the capsular polysaccharide of *Acinetobacter baumannii* AB5075 having the KL25 capsule biosynthesis locus. Carbohydrate Research. 2015;408:8-11.
  26. Shashkov A, Kenyon J, Senchenkova S, Shneider M, Popova A, Arbatsky N, et al. *Acinetobacter baumannii* K27 and K44 capsular polysaccharides have the same K unit but different structures due to the presence of distinct wzy genes in otherwise closely related K gene clusters. Glycobiology. 2016;26(5):501-8.
  27. Shashkov A, Kenyon J, Arbatsky N, Shneider M, Popova A, Miroshnikov K, et al. Structures of three different neutral polysaccharide of *Acinetobacter baumannii*, NIPH190, NIPH201, and NIPH615, assigned to K30, K45, and K48 capsule types, respectively, based on capsule biosynthesis gene clusters. Carbohydrate Research. 2015;417:81-8.
  28. Arbatsky N, Shneider M, Shashkov A, Popova A, Miroshnikov K, Volozhantsev N, et al. Structure of the *N*-acetyl pseudaminic acid-containing capsular polysaccharide of *Acinetobacter baumannii* NIPH67. Russian Chemical Bulletin. 2016;65(2):588–91.
  29. Senchenkova S, Popova A, Shashkov A, Shneider M, Mei Z, Arbatsky N, et al. Structure of a new pseudaminic acid-containing capsular polysaccharide of *Acinetobacter baumannii* LUH5550 having the KL42 capsule biosynthesis locus. Carbohydrate Research. 2015;407:154-7.
  30. Shashkov A, Kenyon J, Arbatsky N, Shneider M, Popova A, Miroshnikov K, et al. Related structures of neutral capsular polysaccharides of *Acinetobacter baumannii*

- isolates that carry related capsule gene clusters KL43, KL47, and KL88. *Carbohydrate Research*. 2016;435:173-9.
31. Kenyon J, Kasimova A, Shashkov A, Hall R, Knirel Y. *Acinetobacter baumannii* isolate BAL\_212 from Vietnam produces the K57 capsular polysaccharide containing a rarely occurring amino sugar N-acetylvirosamine. *Microbiology*. 2018;164:217-20.
  32. Kenyon J, Notaro A, Hsu LY, De Castro C, Hall R. 5,7-Di-N-acetyl-8-epiacinetaminic acid: A new non-2-ulosonic acid found in the K73 capsule produced by an *Acinetobacter baumannii* isolate from Singapore. *Scientific Reports*. 2017;7:11357.
  33. Kasimova A, Kenyon J, Arbatsky N, Shashkov A, Popova A, Knirel Y, et al. Structure of the K82 capsular polysaccharide from *Acinetobacter baumannii* LUH5534 containing a D-galactose 4,6-pyruvic acid acetal *Biochemistry (Moscow)*. 2018;83(7):831-5.
  34. Shashkov A, Shneider M, Senchenkova S, Popova A, Nikitina A, Babenko V, et al. Structure of the capsular polysaccharide of *Acinetobacter baumannii* 1053 having the KL91 capsule biosynthesis gene locus. *Carbohydrate Research*. 2015;404:79-82.
  35. Kasimova A, Shneider M, Arbatsky N, Popova A, Shashkov A, Miroshnikov K, et al. Structure and gene cluster of the K93 capsular polysaccharide of *Acinetobacter baumannii* B11911 containing 5-N-Acetyl-7-N-[(R)-3-hydroxybutanoyl]pseudaminic acid. *Biochemistry (Moscow)*. 2017;82(4):483-9.
  36. Shashkov A, Cahill S, Arbatsky N, Westacott A, Kasimova A, Shneider M, et al. *Acinetobacter baumannii* K116 capsular polysaccharide structure is a hybrid of the K14 and revised K37 structures. *Carbohydr Res*. 2019;CAR\_2019\_291.
  37. Arbatsky N, Kasimova A, Shashkov A, Shneider M, Popova A, Shagin D, et al. Structure of the K128 capsular polysaccharide produced by *Acinetobacter baumannii* KZ-1093 from Kazakhstan. *Carbohydr Res*. 2019.
  38. Arbatsky N, Shneider M, Dmitrenok A, Popova A, Shagin D, Shelenkov A, et al. Structure and gene cluster of the K125 capsular polysaccharide from *Acinetobacter baumannii* MAR13-1452. *International Journal of Biological Macromolecules*. 2018;117:1195-9.

**Table S2.** GenBank and WGS accession numbers for the sequences used to construct the *A. baumannii* OCL database

| <b>OC locus</b> | <b>Reference isolate</b> | <b>GenBank or WGS accession number</b> | <b>Base range</b> | <b>Reference</b> |
|-----------------|--------------------------|----------------------------------------|-------------------|------------------|
| OCL1            | A1                       | CP010781.1                             | 3366405..3375181  | (1-3)            |
| OCL2            | D36                      | CP012952.1                             | 646907..655270    | (1, 3)           |
| OCL3            | A85                      | CP021782.1                             | 3464825..3473737  | (1, 3)           |
| OCL4            | A388                     | CP024418.1                             | 642040..650673    | (3)              |
| OCL5            | G21                      | MG231275.1                             | 37120..46166      | (3)              |
| OCL6            | D46                      | KF030679.1                             | 28675..37977      | (3)              |
| OCL7            | OIFC035                  | AMTB01000038.1 <sup>1</sup>            | 221522..230586    | (3)              |
| OCL8            | OIFC111                  | AMFY01000013.1 <sup>1</sup>            | 222496..228777    | (3)              |
| OCL9            | Naval-72                 | AMFI01000027.1 <sup>1</sup>            | 34336..40843      | (3)              |
| OCL10           | AB_TG27343               | AMIS01000032.1 <sup>1</sup>            | 97841..111169     | (3)              |
| OCL11           | TG22204                  | ASFV01000009.1 <sup>1</sup>            | 33588..43841      | (3)              |
| OCL12           | NIPH 410                 | ATGJ01000006.1 <sup>1</sup>            | 47175..57655      | (3)              |

<sup>1</sup> GenBank or WGS sequence not including current nomenclature and naming

## **References**

1. Kenyon J, Hall R. Variation in the complex carbohydrate biosynthesis loci of *Acinetobacter baumannii* genomes. PLoS One. 2013;8(4):e62160.
2. Kenyon J, Holt K, Pickard D, Dougan G, Hall R. Insertions in the OCL1 locus of *Acinetobacter baumannii* lead to shortened lipooligosaccharides. Research in Microbiology. 2014;165(6):472-5.
3. Kenyon J, Nigro S, Hall R. Variation in the OC locus of *Acinetobacter baumannii* genomes predicts extensive structural diversity in the lipooligosaccharide. PLoS One. 2014;9(9):e107833.
